# Supplementary material for: Knockdown of NAT12/NAA30 reduces tumorigenic features of glioblastoma-initiating cells
Source: PubMed Central journal article supplement (PMC4546247; doi:10.1186/s12943-015-0432-z), 2015-08-21

Supplementary Figure 2

K-means clustering (Pearson 4 groups)

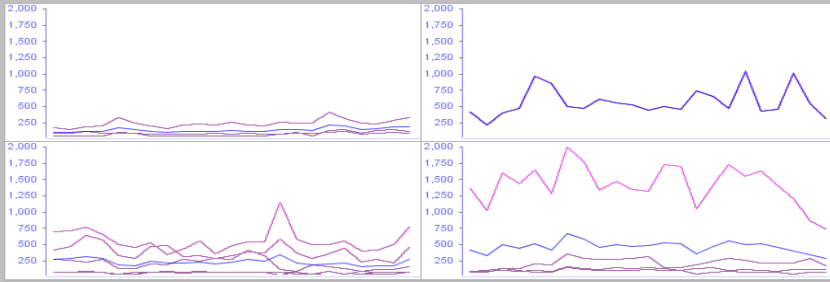

- 2 NAT11
- 6 NAT15
- 12 NAT8L

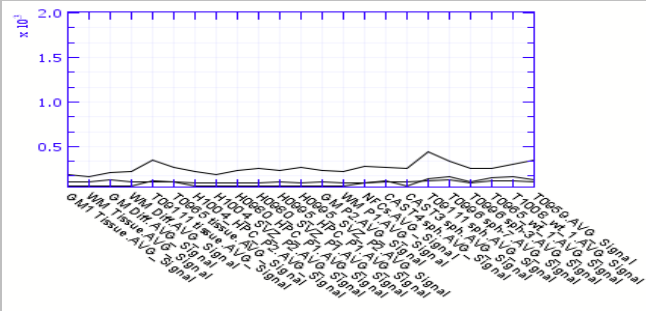

- 1 NAT10
- 7 NAT2
- 9 NAT6
- 10 NAT8
- 11 NAT8B
- 13 NAT9

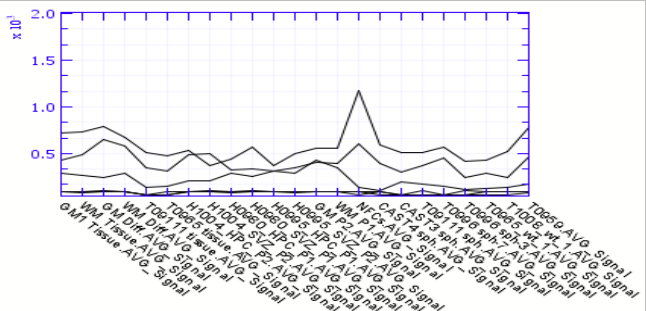

- 5 NAT14

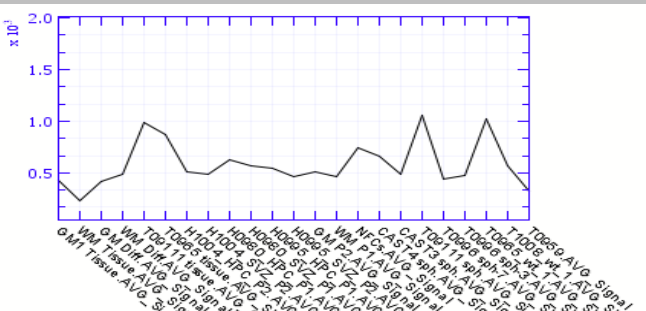

- 0 NAT1
- 3 NAT12
- 4 NAT13
- 8 NAT5

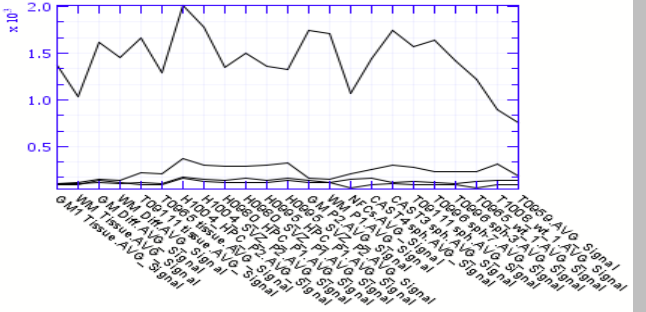

Supplement: 12943_2015_432_MOESM2_ESM.pdf [file 12943_2015_432_MOESM2_ESM.pdf]
