# Supplementary material for: Knockdown of NAT12/NAA30 reduces tumorigenic features of glioblastoma-initiating cells
Source: PubMed Central journal article supplement (PMC4546247; doi:10.1186/s12943-015-0432-z), 2015-08-21
Supplement: 12943_2015_432_MOESM4_ESM.pdf [file 12943_2015_432_MOESM4_ESM.pdf]

## Supplementary file 2

### Additional qPCR statistics for Figure 1

#### Expression of NAT12/NAA30 in GICs compared to NSCs (Figure 1D)

Relative Expression Results

| Gene | Expression | Std. Error    | 95% C.I.       | P(H1) | Result |
|------|------------|---------------|----------------|-------|--------|
| G    | 0.034      | 0,008 - 0,508 | 0,004 - 1,166  |       | 0 DOWN |
| F    | 0.563      | 0,323 - 0,960 | 0,180 - 1,354  | 0.012 | DOWN   |
| E    | 0.456      | 0,213 - 1,099 | 0,095 - 1,209  | 0.007 | DOWN   |
| D    | 0.634      | 0,215 - 1,938 | 0,019 - 3,427  | 0.268 |        |
| C    | 0.472      | 0,222 - 1,366 | 0,020 - 1,802  | 0.033 | DOWN   |
| B    | 0.785      | 0,379 - 1,926 | 0,052 - 3,415  | 0.532 |        |
| A    | 0.826      | 0,372 - 1,712 | 0,143 - 17,279 | 0.641 |        |

#### Expression of NAT12/NAA30 in GICs compared to NSCs (Figure 1F)

| Gene   | Expression | Std. Error    | 95% C.I.        | P(H1) | Result |
|--------|------------|---------------|-----------------|-------|--------|
| RPL30  | 1          |               |                 |       |        |
| ex 2-3 | 2.114      | 0,269 - 9,983 | 0,109 - 168,848 | 0.266 |        |
| ex 3-4 | 1.03       | 0,293 - 4,919 | 0,001 - 27,665  | 0.97  |        |
| ex 4-5 | 1.268      | 0,256 - 4,506 | 0,109 - 18,422  | 0.672 |        |

### Additional qPCR statistics for Figure 3

#### Relative expression of NAT12/NAA30 in KD1 (Figure 3A)

| KD1         |               |            |               |               |        |      |
|-------------|---------------|------------|---------------|---------------|--------|------|
| Gene        | RE            | Std. Error | 95% C.I.      | P(H1)         | Result |      |
| RPL30       | 1             |            |               |               |        |      |
| NAT12/NAA30 | A (398-597)   | 0.748      | 0,386 - 1,808 | 0,309 - 1,980 | 0.36   |      |
|             | B (572-886)   | 0.501      | 0,278 - 0,745 | 0,228 - 1,126 | 0.011  | DOWN |
|             | C (1061-1268) | 0.301      | 0,203 - 0,452 | 0,171 - 0,586 | 0.001  | DOWN |
|             | D (1328-1571) | 1.294      | 0,836 - 2,116 | 0,808 - 2,565 | 0.146  |      |
|             | E (2632-2843) | 0.564      | 0,380 - 0,940 | 0,363 - 0,969 | 0.001  | DOWN |
|             | F (3579-3840) | 0.978      | 0,426 - 1,711 | 0,351 - 1,982 | 0.915  |      |
|             | G (4086-4412) | 0.829      | 0,486 - 1,575 | 0,362 - 1,606 | 0.367  |      |

**Relative expression of NAT12/NAA30 in KD2 (Figure 3B)**

| KD2         |               |            |               |               |        |      |
|-------------|---------------|------------|---------------|---------------|--------|------|
| Gene        | RE            | Std. Error | 95% C.I.      | P(H1)         | Result |      |
| RPL30       | 1             |            |               |               |        |      |
| NAT12/NAA30 | A (398-597)   | 0.683      | 0,430 - 1,210 | 0,367 - 2,420 | 0.368  |      |
|             | B (572-888)   | 0.468      | 0,342 - 0,649 | 0,294 - 0,752 | 0.002  | DOWN |
|             | C (1061-1268) | 0.422      | 0,266 - 0,689 | 0,195 - 0,873 | 0.019  | DOWN |
|             | D (1328-1571) | 0.719      | 0,554 - 0,928 | 0,461 - 1,321 | 0.099  |      |
|             | E (2632-2843) | 0.764      | 0,477 - 1,087 | 0,368 - 1,236 | 0.256  |      |
|             | F (3579-3840) | 0.761      | 0,566 - 1,101 | 0,428 - 1,218 | 0.167  |      |
|             | G (4086-4412) | 0.85       | 0,515 - 1,179 | 0,420 - 1,421 | 0.61   |      |

**Additional qPCR statistics for Figure 5**

**Relative Expression of GFAP, NES and TUBIII in NAT12/NAA30 KD1 and KD2 (Figure 5B)**

| Gene       | RE     | Std. Error       | 95% C.I.         | P(H1) | Result |
|------------|--------|------------------|------------------|-------|--------|
| RPL30      | 1      |                  |                  |       |        |
| GFAP1      | 55.637 | 32,739 - 103,666 | 23,247 - 236,915 | 0     | UP     |
| GFAP2      | 21.545 | 13,304 - 31,331  | 11,388 - 72,955  | 0     | UP     |
| NESTIN     | 0.981  | 0,692 - 1,309    | 0,575 - 2,863    | 0.926 |        |
| TUBULINIII | 1.183  | 0,817 - 1,556    | 0,644 - 3,336    | 0.348 |        |
