# Supplementary material for: Knockdown of NAT12/NAA30 reduces tumorigenic features of glioblastoma-initiating cells
Source: Springer Nature journal article supplement (doi:10.1186/s12943-015-0432-z), 2015-08-20
Supplement: MOESM3 [file 9763212]

## Supplementary file 1

### Probes and oligonucleotides used for expression analysis of *NAA30/NAT12*

#### Microarray probes:

1. **ILMN\_2128087 (used in this study)**
2. **AGCCGGGAATTGCTGGGGTTTAGATGCACTTTTTCTTTTGAGAGTAAGGG**  
and mapped to the 2085-2134 region (3'UTR) of the reference sequence:  
NM\_001011713.2.
3. **Affimetrix 225679\_at** (REMBRANDT database)  
corresponds to the 3'UTR 4005-4404 of the reference sequence NAT12/NAA30,  
NM\_001011713.2.
4. **Affimetrix 228322\_at** (REMBRANDT database)  
correspond to the coding region 581-877 of the reference sequence of the NAT12/NAA30,  
NM\_001011713.2.
5. **Affimetrix 228321\_at** (REMBRANDT database)  
correspond to the coding region 944-1061 of the reference sequence of the NAT12/NAA30,  
NM\_001011713.2.

#### Oligonucleotides:

>Oli\_79\_DIR\_RPL30\_228; AGCTTTGAGGAAATCTGAAATAGAGTA  
>Oli\_80\_REV\_RPL30\_441; GTGAAATTTTGTAGGTGAAAAGGTTTA  
>Oli\_81\_DIR\_RPL27\_226; GTATAACTACAATCACCTAATGCCAC  
>Oli\_82\_REV\_RPL27\_477; TTTAATGATCAAAACAAAGCATCTAAA  
>Oli\_117\_DIR\_GFAP\_V2\_set1\_1523; AGTAACTGTACATTAAACTGGCAGAGC  
>Oli\_118\_REV\_GFAP\_V2\_set1\_1817; TAACATTAAGAGCAGGGAACATAAAAC  
>Oli\_123\_DIR\_GFAP\_V1\_set2\_2101; GATGACTCAAGTGTCTCAGTCCAC  
>Oli\_124\_REV\_GFAP\_V1\_set2\_2434; GAGTCACTTCCTTAATTTCCACAAT  
>Oli\_129\_DIR\_NES\_set1\_5247; CTAAGTCAGCTGAATCCCGATAGTA  
>Oli\_130\_REV\_NES\_set1\_5544; CATTACTTTATTCAGGCAGGGACTA  
>Oli\_135\_DIR\_TUB\_set1\_1368; AGATGTACGAAGACGACGAGGAG  
>Oli\_136\_REV\_TUB\_set1\_1712; TTAAGGGTATCTGACAGCAATAGATTT  
>Oli\_279\_DIR\_NAT12\_setG\_4086; CTGACATGTCTAAGACTGGATGTGTAT  
>Oli\_280\_REV\_NAT12\_setG\_4412; CATTAAATCTCTCTCCAAAAGGATATG  
>Oli\_281\_DIR\_NAT12\_setF\_3579; TTTTGATAATAGGCTGTTGTTTTCTT  
>Oli\_282\_REV\_NAT12\_setF\_3840; ACACATCAAAAATGATAGTATACCCGT  
>Oli\_283\_DIR\_NAT12\_setE\_2632; ACTGTAGGAATCTGTTGTTGTTTCAT  
>Oli\_284\_REV\_NAT12\_setE\_2843; CACTTTCAAAAACACTATACTGAGCAA  
>Oli\_285\_DIR\_NAT12\_setD\_1328; GATTTAGTAATTTCCATGCAGCTCTTA  
>Oli\_286\_REV\_NAT12\_setD\_1571; TATGTTCCACTTACTGGTTCTGTGATA  
>Oli\_287\_DIR\_NAT12\_setC\_1061; TTAAGAAAGCTATATATGCCATGGTTG  
>Oli\_288\_REV\_NAT12\_setC\_1268; GATAGTTGTTCTTGATGTCAGTTTCT  
>Oli\_289\_DIR\_NAT12\_setB\_572; ACTCCCTCTCTAGTAATGCAAGAACT  
>Oli\_290\_REV\_NAT12\_setB\_886; TATAGGTATAAATGGAGTAGGGTTCGG  
>Oli\_291\_DIR\_NAT12\_setA\_398; AGCAGCTCAACGGATTGATTAG  
>Oli\_292\_REV\_NAT12\_setA\_597; AGTTCTTGCATTACTAGAGAGGGAGT
