# Supplementary material for: Knockdown of NAT12/NAA30 reduces tumorigenic features of glioblastoma-initiating cells
Source: Springer Nature journal article supplement (doi:10.1186/s12943-015-0432-z), 2015-08-20
Supplement: MOESM5 [file 9763212]

# Supplementary Figure 3

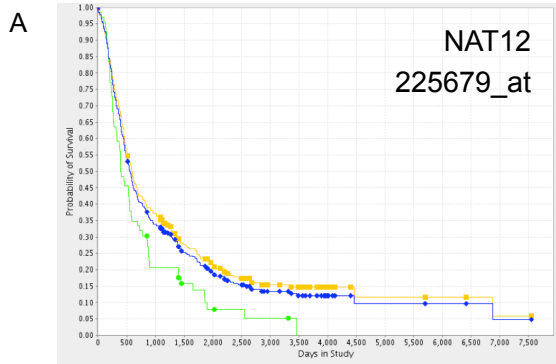

Number of samples in group:  
Down-Regulated: 66  
Intermediate: 277  
Up-Regulated vs. Intermediate:  $p=0.0060614742$

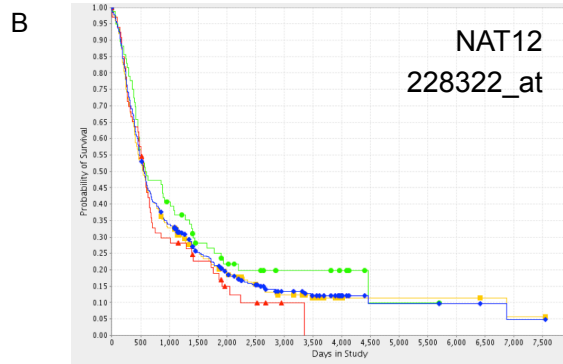

Number of samples in group:  
Up-Regulated: 66  
Down-Regulated: 76  
Intermediate: 201  
Up-Regulated vs. Intermediate:  $p=0.5535712293$   
Down-Regulated vs. Intermediate:  $p=0.2266796943$

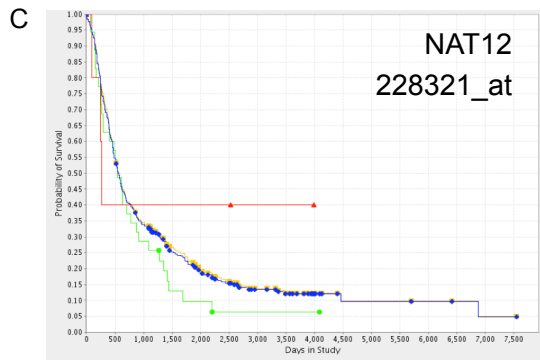

Number of samples in group:  
Up-Regulated: 5  
Down-Regulated: 35  
Intermediate: 303  
Up-Regulated vs. Intermediate:  $p=0.5067904872$   
Down-Regulated vs. Intermediate:  $p=0.2177514054$

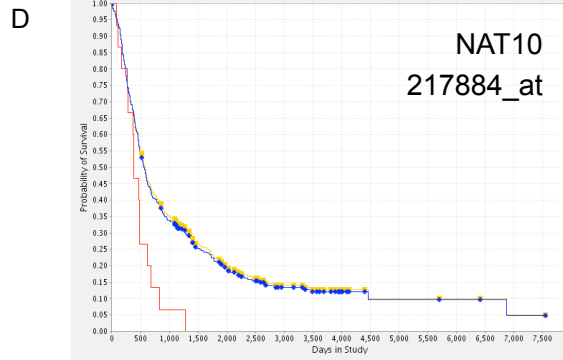

Number of samples in group:  
Up-Regulated: 15  
Intermediate: 328  
Up-Regulated vs. Intermediate:  $p=0.0060838757$

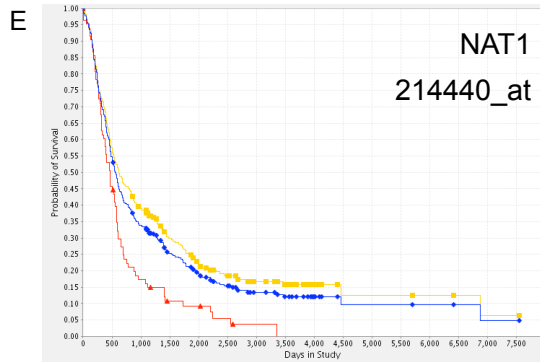

Number of samples in group:  
Up-Regulated: 83  
Intermediate: 260  
Up-Regulated vs. Intermediate:  $p=1.130635E-4$

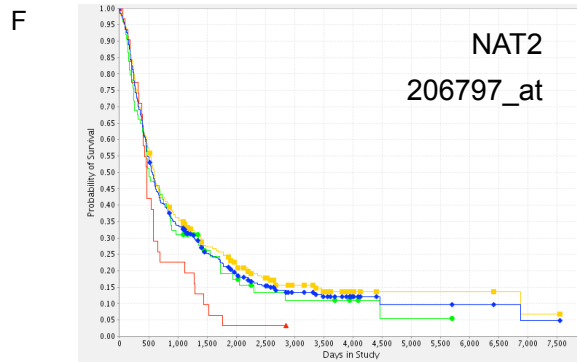

Number of samples in group:  
Up-Regulated: 31  
Intermediate: 238  
Up-Regulated vs. Intermediate:  $p=0.02067296$
