# Supplementary material for: Knockdown of NAT12/NAA30 reduces tumorigenic features of glioblastoma-initiating cells
Source: Springer Nature journal article supplement (doi:10.1186/s12943-015-0432-z), 2015-08-20

# Supplementary Figure 9

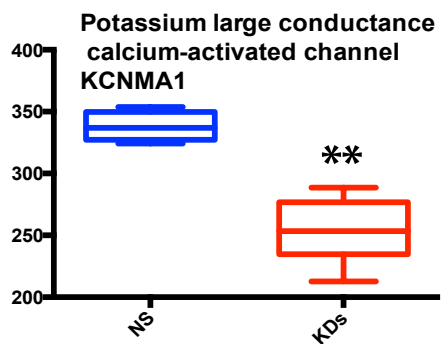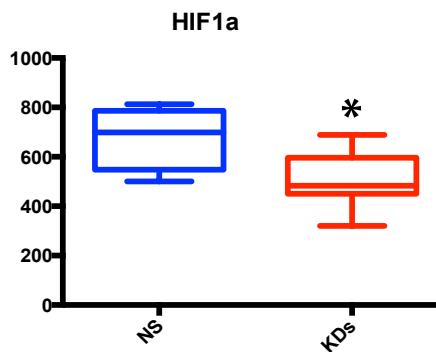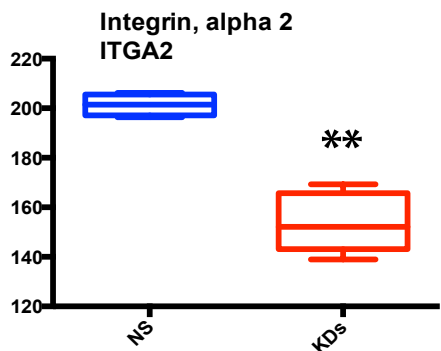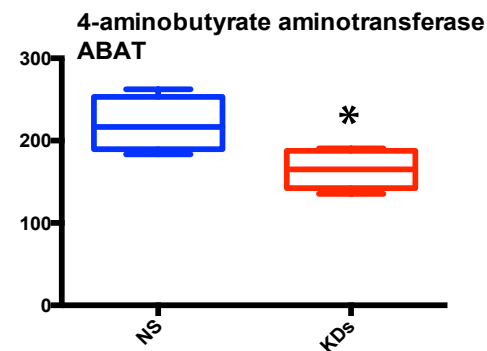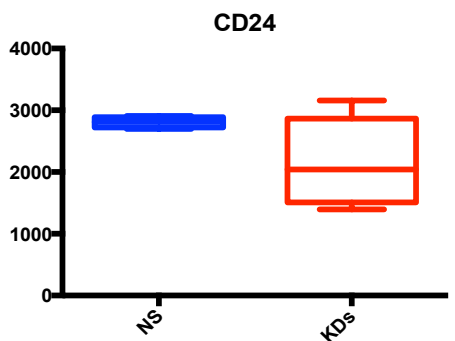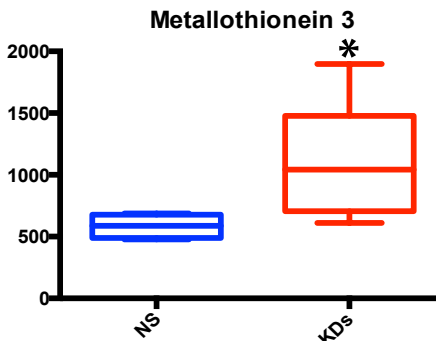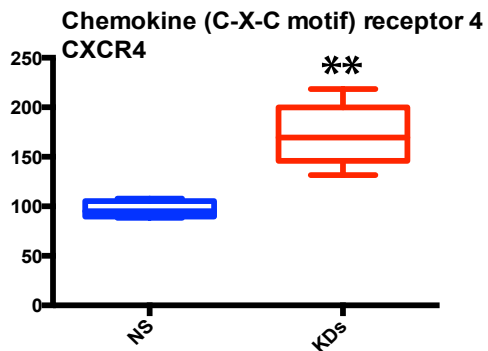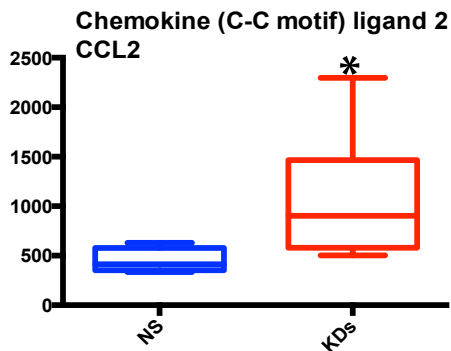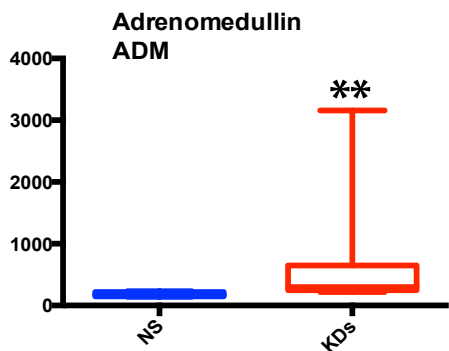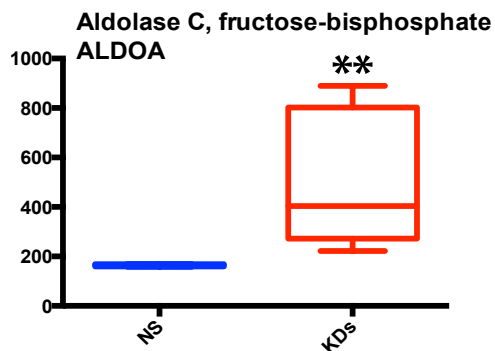

Supplement: MOESM10 [file 9763212]
